# Supplementary material for: EGFR/Ras Signaling Controls Drosophila Intestinal Stem Cell Proliferation via Capicua-Regulated Genes
Source: PubMed Central journal article supplement (PMC4684324; doi:10.1371/journal.pgen.1005634), 2015-12-18
Supplement: pgen.1005634.s011.pdf [file pgen.1005634.s011.pdf]

# S4 Table

| <b>S4 Table. Growth regulatros in RNA-seq and DamID-seq</b> |                   |                                    |                |             |                                       |
|-------------------------------------------------------------|-------------------|------------------------------------|----------------|-------------|---------------------------------------|
| <b>Gene Name</b>                                            | <b>FlyBase ID</b> | <b>log2 Fold change in RNA-Seq</b> | <b>p-value</b> | <b>FDR</b>  | <b>Number of peaks from DamID-Seq</b> |
| Egfr                                                        | FBgn0003731       | 0.396823326                        | 0.003130705    | 0.026285491 | 5                                     |
| Pvr                                                         | FBgn0032006       | 0.08367124                         | 0.550648602    | 0.760870425 | 0                                     |
| bnl                                                         | FBgn0014135       | 0.341343527                        | 0.01597985     | 0.086804798 | 1                                     |
| InR                                                         | FBgn0013984       | 0.8173407                          | 1.07E-07       | 6.73E-06    | 1                                     |
| Akt1                                                        | FBgn0010379       | 0.491905074                        | 6.21E-05       | 0.001313506 | 1                                     |
| Pi3K21B                                                     | FBgn0020622       | 0.076680225                        | 0.521164182    | 0.738806317 | 1                                     |
| Pi3K59F                                                     | FBgn0015277       | -0.564612619                       | 7.53E-06       | 0.000245288 | 0                                     |
| Pi3K68D                                                     | FBgn0015278       | -0.225577118                       | 0.092345618    | 0.278946255 | 0                                     |
| Pi3K92E                                                     | FBgn0015279       | 0.163285775                        | 0.289577478    | 0.544273858 | 0                                     |
| Rheb                                                        | FBgn0041191       | -0.325749099                       | 0.013170328    | 0.074677832 | 1                                     |
| Pten                                                        | FBgn0026379       | -0.063052057                       | 0.7286371      | 0.869404353 | 0                                     |
| S6k                                                         | FBgn0015806       | -0.256735962                       | 0.082909218    | 0.259920237 | 0                                     |
| dm(Myc)                                                     | FBgn0262656       | 0.198450761                        | 0.162583155    | 0.389608008 | 1                                     |
| Tif-IA                                                      | FBgn0032988       | 0.199704149                        | 0.117858829    | 0.321230939 | 0                                     |
| Brf                                                         | FBgn0038499       | 0.181791338                        | 0.47121442     | 0.703756109 | 0                                     |
| Maf1                                                        | FBgn0058196       | 0.039614682                        | 0.775112954    | 0.893548434 | 0                                     |
| Src64B                                                      | FBgn0262733       | -0.159194964                       | 0.200881154    | 0.440306122 | 0                                     |
| Src42A                                                      | FBgn0264959       | -0.015371949                       | 0.912296323    | 0.963752427 | 1                                     |
| Ack                                                         | FBgn0028484       | 0.342997507                        | 0.017618912    | 0.092770616 | 1                                     |
| Btk29A                                                      | FBgn0003502       | 0.084274149                        | 0.807789359    | 0.909543003 | 1                                     |
| CycD                                                        | FBgn0010315       | 0.147362775                        | 0.598057015    | 0.791401204 | 0                                     |
| Cdk4                                                        | FBgn0004107       | 0.429571817                        | 0.018271328    | 0.09483809  | 2                                     |
| crb                                                         | FBgn0259685       | -0.068538173                       | 0.655680161    | 0.830976355 | 1                                     |
| yki                                                         | FBgn0034970       | -0.185011084                       | 0.138529244    | 0.354259222 | 1                                     |
| rDNA loci                                                   | —                 | not tested                         | not tested     | not tested  | 0                                     |
