# Supplementary material for: EGFR/Ras Signaling Controls Drosophila Intestinal Stem Cell Proliferation via Capicua-Regulated Genes
Source: PLoS Genet. 2015 Dec 18;11(12):e1005634. doi: 10.1371/journal.pgen.1005634 (PMC4684324; doi:10.1371/journal.pgen.1005634)
Supplement: S5 Table — Three Lists of the non-protein coding RNAs such as tRNA, snRNA & snoRNA and non-protein coding genes that have Cic binding sites in their loci within the 5 kb range in the transcription start site were included in this table. Each data sheet shows the specific genomic location of each peak with detailed information for the Cic binding peaks such as, chromosome, Peak starting sites, Peak ending sites, Log2 fold change of CicDam/Dam-only, FlyBase ID and Gene symbol. (S5-1) Cic binding tRNAs. (S5-2) Cic binding snRNAs & snoRNAs. (S5-3) Cic binding non-protein coding genes. (XLSX) [file pgen.1005634.s012.xlsx]

## Sheet: Cic binding tRNAs
S5-1. Cic binding tRNAs
Chromosome	Peak starting sites	Peak ending sites	Log2 fold change of CicDam/Dam-only	p-value	FDR	FlyBase ID	Gene symbol
2L	2013525	2014275	3.84658	0.00470011	0.00821644	FBgn0051669	tRNA:CR31669
2L	5236050	5237925	4.3587	0.00254269	0.00229906	FBgn0051971	tRNA:CR31971
2L	8538150	8539275	4.73146	0.00115672	0.00187163	FBgn0051604	tRNA:CR31604
2L	9237225	9238875	4.72094	0.00115064	0.0242968	FBgn0051885	tRNA:CR31885
2L	14492850	14495850	4.71025	0.000768217	0.000235651	FBgn0028882	tRNA:P:35Bd
2L	14515575	14517150	3.98746	0.00537923	0.0507076	FBgn0011862	tRNA:G3:35Ba
2R	6139275	6145800	4.57216	0.00154311	0.00261018	FBgn0011958	tRNA:R2:42Ad
2R	6139275	6145800	4.57216	0.00154311	0.00261018	FBgn0011891	tRNA:K2:42Ae
2R	6152850	6153675	4.31018	0.00383075	0.0861012	FBgn0011937	tRNA:N5:42Ag
2R	6152850	6153675	4.31018	0.00383075	0.0861012	FBgn0011938	tRNA:N5:42Ah
2R	6152850	6153675	4.31018	0.00383075	0.0861012	FBgn0011936	tRNA:N5:42Af
2R	6178650	6179925	4.52171	0.00112408	0.0122485	FBgn0011955	tRNA:R2:42Aa
2R	11397525	11397900	3.80957	0.0048931	0.0120673	FBgn0050506	tRNA:CR30506
2R	11397525	11397900	3.80957	0.0048931	0.0120673	FBgn0050257	tRNA:CR30257
2R	11650425	11652675	4.46323	0.00201223	0.0301926	FBgn0050254	tRNA:CR30254
2R	11650425	11652675	4.46323	0.00201223	0.0301926	FBgn0011915	tRNA:M2:48Ba
2R	12334050	12335175	4.25901	0.00304948	6.67977e-05	FBgn0050249	tRNA:CR30249
2R	12334050	12335175	4.25901	0.00304948	6.67977e-05	FBgn0050250	tRNA:CR30250
2R	12334050	12335175	4.25901	0.00304948	6.67977e-05	FBgn0050251	tRNA:CR30251
2R	12335700	12337050	4.24045	0.00422755	0.000352063	FBgn0011878	tRNA:H:48F
2R	12335700	12337050	4.24045	0.00422755	0.000352063	FBgn0011877	tRNA:HPsi
2R	13425675	13430925	5.03794	0.000596663	0.00599258	FBgn0011881	tRNA:I:49Fa
2R	13425675	13430925	5.03794	0.000596663	0.00599258	FBgn0011909	tRNA:L3:49Fa
2R	13437900	13438875	4.40954	0.00219309	0.0149718	FBgn0050509	tRNA:CR30509
2R	14980500	14987025	4.53393	0.000240747	0.0141722	FBgn0050241	tRNA:CR30241
2R	16206225	16206750	3.67171	0.00807752	0.00699626	FBgn0050237	tRNA:CR30237
2R	16207950	16210950	4.14482	0.00176287	0.0834085	FBgn0050237	tRNA:CR30237
2R	16212000	16212750	4.27057	0.00368458	0.00311104	FBgn0050237	tRNA:CR30237
2R	18764775	18768225	4.79847	0.00252931	0.0230609	FBgn0050229	tRNA:CR30229
2R	19415100	19415325	3.77874	0.00719449	0.092387	FBgn0050326	tRNA:CR30326
2R	19415100	19415325	3.77874	0.00719449	0.092387	FBgn0050225	tRNA:CR30225
2R	21159300	21160350	4.08814	0.00461153	0.012028	FBgn0050206	tRNA:CR30206
2R	23069325	23069775	3.80218	0.00746346	0.00773674	FBgn0050201	tRNA:CR30201
3L	774075	775725	4.50912	0.00207722	0.00980868	FBgn0052481	tRNA:CR32481
3L	8056425	8060250	5.01628	0.000773019	0.02303	FBgn0052358	tRNA:CR32358
3L	1381800	1382850	4.3372	0.00307449	0.00169278	FBgn0052329	tRNA:CR32329
3L	3122550	3125625	5.09844	0.000933325	0.0469071	FBgn0052273	tRNA:CR32273
3L	8066250	8068425	4.23252	0.00343593	0.0139326	FBgn0052363	tRNA:CR32363
3L	8066250	8068425	4.23252	0.00343593	0.0139326	FBgn0052362	tRNA:CR32362
3L	5351475	5356575	5.333	0.000436516	0.00725056	FBgn0052420	tRNA:CR32420
3L	747825	752775	4.74183	0.00109005	0.0304934	FBgn0052482	tRNA:M-i:61D
3L	764325	767250	4.24425	0.00255541	0.0236496	FBgn0052480	tRNA:CR32480
3R	6822825	6823200	4.05611	0.00461354	0.00571215	FBgn0011904	tRNA:K5:84ABa
3R	7474950	7476075	4.07273	0.00474935	0.00053459	FBgn0012001	tRNA:V3b:84Dd
3R	17646750	17647725	3.69809	0.00803829	0.000537938	FBgn0051580	tRNA:CR31580
3R	20605650	20606625	4.42693	0.0013644	0.00382827	FBgn0051506	tRNA:CR31506
3R	20891100	20891850	4.40436	0.00335626	0.00179996	FBgn0051334	tRNA:CR31334
3R	20891100	20891850	4.40436	0.00335626	0.00179996	FBgn0051480	tRNA:CR31480
3R	20891100	20891850	4.40436	0.00335626	0.00179996	FBgn0051333	tRNA:CR31333
3R	24268350	24269325	4.28848	0.00313668	0.00455371	FBgn0051130	tRNA:CR31130
X	3426900	3431100	5.55894	0.000193772	0.0328277	FBgn0052493	tRNA:CR32493

## Sheet: snRNA & snoRNA
S5-2. Cic binding snRNAs & snoRNAs
Chromosome	Peak starting sites	Peak ending sites	Log2 fold change of CicDam/Dam-only	p-value	FDR	FlyBase ID	Gene symbol
X	12497550	12498675	4.29327	0.00258487	0.0255965	FBgn0086047	snoRNA:Me18S-G894
X	17147250	17150100	4.9345	0.000974804	0.022092	FBgn0083012	snoRNA:Psi28S-1135a
2L	3044100	3046500	4.92396	0.00124911	0.0389025	FBgn0263847	snRNA:LU
2L	866550	868500	4.19673	0.00233162	0.031145	FBgn0086031	snoRNA:Me28S-U1230
2L	12504150	12512475	8.61946	4.99661e-08	0.0563386	FBgn0263458	snoRNA:CG43051-a
2L	12512625	12513150	3.75549	0.00712135	0.07703	FBgn0263458	snoRNA:CG43051-a
2L	16526250	16527000	4.29239	0.0026227	0.0336903	FBgn0086038	snoRNA:Me28S-C1237
2R	8723400	8725050	4.57806	0.00135616	7.56156e-05	FBgn0263463	snoRNA:gcl-a
2R	9098250	9099225	3.98611	0.00488725	0.0296409	FBgn0086603	snoRNA:Or-CD2
2R	10533750	10536900	5.67306	0.000135732	0.0025907	FBgn0263466	snoRNA:lola-a
2R	10533750	10536900	5.67306	0.000135732	0.0025907	FBgn0263481	snoRNA:lola-b
2R	10536975	10539375	5.98431	2.23907e-05	0.0417779	FBgn0263483	snoRNA:lola-d
2R	10536975	10539375	5.98431	2.23907e-05	0.0417779	FBgn0263482	snoRNA:lola-c
2R	11892225	11893875	4.67923	0.00553991	0.0293643	FBgn0015543	snoRNA:Me28S-A1322
2R	14621175	14622675	4.46314	0.000933325	0.00233781	FBgn0082951	snoRNA:Me18S-C1366
2R	14621175	14622675	4.46314	0.000933325	0.00233781	FBgn0082940	snoRNA:Me28S-C3227a
2R	14621175	14622675	4.46314	0.000933325	0.00233781	FBgn0082939	snoRNA:Me28S-C3227b
2R	14621175	14622675	4.46314	0.000933325	0.00233781	FBgn0082926	snoRNA:Me28S-U1848
2R	18140100	18142650	4.19061	0.00307625	0.00458876	FBgn0083054	snoRNA:Psi18S-1347a
2R	22191900	22195650	4.51879	0.00159237	0.00403435	FBgn0086027	snoRNA:Or-CD1
2R	22197300	22198425	4.73711	0.00111957	0.00127892	FBgn0086027	snoRNA:Or-CD1
2R	22199175	22199775	3.82962	0.00642697	0.0620734	FBgn0086027	snoRNA:Or-CD1
3L	16656375	16661775	5.07274	0.000183027	0.0502854	FBgn0041721	snRNA:U12:73B
3L	17999625	18001200	5.16094	0.000327778	0.0438563	FBgn0086081	snoRNA:Me28S-A30
3L	18894750	18898500	4.9497	0.000885257	0.00873245	FBgn0086661	snoRNA:Psi28S-2566
3L	18001875	18004575	4.38512	0.0015341	0.0664656	FBgn0086081	snoRNA:Me28S-A30
3L	1488600	1489425	3.89013	0.00587873	0.0901791	FBgn0086670	snoRNA:Psi28S-2622
3L	8601375	8601600	3.70455	0.00657265	0.0419886	FBgn0060292	snoRNA:U49
3L	262875	265275	4.21284	0.00249566	0.00395939	FBgn0083014	snoRNA:Psi18S-996
3L	885675	888150	4.78816	0.000911565	0.00179085	FBgn0263476	snoRNA:CG32479-b
3R	7474950	7476075	4.07273	0.00474935	0.00053459	FBgn0065099	snRNA:7SK
3R	23859525	23860200	4.45859	0.00367927	0.0577159	FBgn0004185	snRNA:U1:95Ca
3R	5599350	5602125	5.28795	0.000378937	0.0484784	FBgn0082989	snoRNA:Psi28S-2442a
3R	9350100	9354150	5.18765	0.000451413	0.0427281	FBgn0086053	snoRNA:Me18S-G1358a
3R	14361750	14372325	5.79173	0.000108219	0.0153828	FBgn0086058	snoRNA:Me18S-G1189
3R	20913000	20914875	4.64203	0.00124373	0.043813	FBgn0263460	snoRNA:CG31191-a
3R	28600200	28601100	4.12474	0.00474945	0.00560821	FBgn0082960	snoRNA:Psi28S-3405a
4	68625	70350	4.50332	0.00242272	0.000314766	FBgn0263851	snoRNA:CD-24

## Sheet: non-protein coding genes
S5-3. Cic binding non-protein coding genes
Chromosome	Peak starting sites	Peak ending sites	Log2 fold change of CicDam/Dam-only	p-value	FDR	FlyBase ID	Gene symbol
X	13332750	13333500	4.4035	0.00209176	0.0366167	FBgn0052636	CR32636
X	2330475	2330925	3.78678	0.00700119	0.0272623	FBgn0053218	CR33218
X	2331000	2333925	4.75473	0.0011156	0.00312156	FBgn0053218	CR33218
X	12658125	12671925	5.73194	0.000160972	0.0032104	FBgn0053963	CR33963
X	3545175	3546825	4.44957	0.00174693	0.00439198	FBgn0085364	CR34335
X	9686250	9687075	4.63263	0.00112885	0.0513477	FBgn0261522	CR42657
X	7703625	7709100	5.95552	9.64532e-05	0.0114513	FBgn0262979	CR43287
X	7709175	7710450	4.65263	0.00149234	0.0383509	FBgn0262979	CR43287
X	22490475	22491975	4.65729	0.000844801	0.00616537	FBgn0263504	CR43493
X	6758925	6760350	4.91429	0.00111273	0.0377715	FBgn0263507	CR43496
X	6591900	6592725	5.37764	0.000404646	0.0189715	FBgn0264380	CR43832
X	13751775	13755075	4.89071	0.000585904	0.00908203	FBgn0264381	CR43833
X	10212525	10213350	4.28922	0.00481	0.031837	FBgn0264500	CR43899
X	10208475	10211625	5.38823	0.000434317	0.0429477	FBgn0264500	CR43899
X	12726225	12745725	5.69012	7.41225e-05	0.0423499	FBgn0264678	CR43963
X	5914800	5920800	5.86662	0.00012935	0.0174245	FBgn0264939	CR44108
X	17578650	17579550	4.21841	0.00287034	0.0114679	FBgn0264955	CR44124
X	11569350	11570925	5.18899	0.000860832	0.0246921	FBgn0265252	CR44266
X	19495575	19501950	4.76559	0.000933325	0.0048074	FBgn0265428	CR44340
X	15807075	15808725	4.45351	0.00136306	0.0849433	FBgn0265534	CR44384
X	21044175	21046800	4.47752	0.00154987	0.0270357	FBgn0265613	CR44431
X	21043350	21044025	4.44642	0.00317775	0.000237422	FBgn0265613	CR44431
X	19667250	19668975	4.80355	0.00108395	0.000372533	FBgn0265705	CR44512
X	13396425	13397250	3.96789	0.0029623	0.0465633	FBgn0265832	CR44621
X	13990275	13991400	4.60808	0.00260529	0.0203016	FBgn0265866	CR44655
X	13987050	13989750	4.89575	0.00148703	0.0400673	FBgn0265866	CR44655
X	17494500	17496600	5.21278	0.000334414	0.00240403	FBgn0265903	CR44692
X	1050825	1051950	4.36793	0.00184259	0.0016499	FBgn0266005	CR44779
X	1047375	1048350	4.10295	0.00314543	0.0447338	FBgn0266005	CR44779
X	15496875	15503925	5.33927	0.000596663	0.0359635	FBgn0266182	CR44888
X	496725	499950	4.41973	0.00175922	0.043567	FBgn0266196	CR44891
X	496725	499950	4.41973	0.00175922	0.043567	FBgn0266197	CR44892
X	10208475	10211625	5.38823	0.000434317	0.0429477	FBgn0266199	CR44894
X	15313800	15315075	4.80341	0.00165544	0.0554571	FBgn0266276	CR44961
X	11791800	11792925	3.79958	0.00599367	0.00780191	FBgn0266277	CR44962
X	766050	770625	5.53411	7.39353e-05	0.0245946	FBgn0266281	CR44966
X	3370575	3375375	5.76617	7.11256e-05	0.0112252	FBgn0266350	CR44999
X	21519000	21520575	4.43838	0.00158727	0.0280584	FBgn0266457	CR45082
X	615900	617175	4.95891	0.000656365	0.0350323	FBgn0267030	CR45474
X	2269275	2271000	4.18086	0.000948349	0.00483805	FBgn0267036	CR45480
X	5428350	5429775	4.57058	0.00199458	0.00509712	FBgn0267073	CR45517
X	5515425	5519100	5.17083	0.000139198	0.0511132	FBgn0267074	CR45518
X	5690025	5691300	4.94725	0.000760059	0.0524205	FBgn0267081	CR45525
X	5756175	5757675	5.0661	0.000750367	0.0123141	FBgn0267084	CR45528
X	6858000	6864150	10.5136	2.5359e-14	0.022373	FBgn0267087	CR45531
X	9580650	9586425	5.85593	5.25545e-05	0.00995304	FBgn0267100	CR45540
X	9579300	9580200	4.85908	0.000845975	0.0345005	FBgn0267100	CR45540
X	9580650	9586425	5.85593	5.25545e-05	0.00995304	FBgn0267101	CR45541
X	9594375	9594750	3.97177	0.00635659	0.0362584	FBgn0267102	CR45542
X	9594375	9594750	3.97177	0.00635659	0.0362584	FBgn0267103	CR45543
X	9595050	9601575	5.39692	0.000391315	0.00310965	FBgn0267103	CR45543
X	21367050	21369825	4.79778	0.000910988	0.000787106	FBgn0267172	CR45612
X	11713650	11716350	5.05817	0.000502308	0.00967513	FBgn0267178	CR45618
X	12611325	12612600	3.77756	0.00559119	0.0127373	FBgn0267181	CR45621
X	5899350	5903400	5.6654	7.70211e-05	0.0622232	FBgn0267228	CR45668
2L	14020950	14024850	5.158	0.000318247	0.018522	FBgn0051840	CR31840
2L	13776750	13778550	4.82094	0.000901408	0.00664205	FBgn0051845	CR31845
2L	21321600	21322650	4.25404	0.00317516	0.036188	FBgn0261586	CR42696
2L	12545550	12547275	4.15191	0.00395498	0.0173018	FBgn0261709	CR42746
2L	2242725	2243925	5.50128	0.000122792	0.046049	FBgn0262106	CR42859
2L	12504150	12512475	8.61946	4.99661e-08	0.0563386	FBgn0262353	CR43051
2L	21622800	21624600	4.42596	0.00250792	0.000115935	FBgn0262631	CR43148
2L	20316300	20317725	4.51825	0.00155368	0.00980067	FBgn0263581	CR43606
2L	6794025	6794925	3.96697	0.00589562	0.0231971	FBgn0263585	CR43610
2L	11391975	11394900	4.48965	0.00130674	0.04293	FBgn0263764	CR43681
2L	435150	436425	4.89937	0.000983687	0.0224027	FBgn0263870	CR43717
2L	2174250	2181225	5.91436	3.27493e-05	0.00256003	FBgn0265017	CR43751
2L	1157700	1159275	4.48779	0.00087613	0.00826946	FBgn0264267	CR43767
2L	6077775	6079725	6.00437	4.84756e-05	0.0143441	FBgn0264345	CR43801
2L	3571950	3573450	5.80049	0.000420918	0.0981437	FBgn0264370	CR43822
2L	3575925	3576525	4.28785	0.003814	0.0241615	FBgn0264370	CR43822
2L	7422375	7427325	5.9776	4.10361e-05	0.0735196	FBgn0264439	CR43857
2L	3475650	3480675	8.17654	1.55707e-09	0.0433247	FBgn0264549	CR43928
2L	11839875	11840475	4.1759	0.0045854	0.00176491	FBgn0264564	CR43936
2L	11839875	11840475	4.1759	0.0045854	0.00176491	FBgn0264565	CR43937
2L	7518600	7521150	4.80548	0.000726312	0.0566925	FBgn0264891	CR44082
2L	20793075	20794125	4.77864	0.00171391	0.00432876	FBgn0264995	CR44146
2L	134250	137625	5.03325	0.000716411	0.0348621	FBgn0265074	CR44185
2L	134250	137625	5.03325	0.000716411	0.0348621	FBgn0265075	CR44186
2L	244425	248625	5.82232	4.13149e-06	0.00912425	FBgn0265149	CR44218
2L	219450	223725	5.68604	0.00014989	0.00239838	FBgn0265151	CR44220
2L	219450	223725	5.68604	0.00014989	0.00239838	FBgn0265153	CR44222
2L	23173125	23174100	4.39333	0.00180676	4.62724e-05	FBgn0265254	CR44268
2L	21795225	21795675	3.80523	0.00815215	0.0297764	FBgn0265255	CR44269
2L	16885575	16889700	5.00642	0.000713574	0.0205923	FBgn0265542	CR44392
2L	17423700	17433075	4.32943	0.000596663	0.0410951	FBgn0265582	CR44409
2L	18144075	18146025	4.27001	0.000825257	0.0632655	FBgn0265671	CR44478
2L	5899725	5903700	4.81652	0.000782175	0.023655	FBgn0265790	CR44579
2L	12009825	12013950	4.81594	0.000939314	0.00838514	FBgn0265799	CR44588
2L	12044700	12047475	5.41583	0.000404338	6.81969e-05	FBgn0265800	CR44589
2L	7078950	7079925	4.83886	0.00162685	0.00515329	FBgn0265822	CR44611
2L	10543500	10545075	4.38973	0.00192684	0.00152571	FBgn0265829	CR44618
2L	14230425	14232150	4.73275	0.00117533	0.0254438	FBgn0265940	CR44727
2L	14232675	14233800	4.06768	0.00356403	0.086742	FBgn0265940	CR44727
2L	14457300	14458275	8.17454	6.05712e-08	0.0180281	FBgn0265943	CR44730
2L	14400300	14406000	5.33103	0.000466466	0.00907587	FBgn0265946	CR44733
2L	5255700	5257800	5.01181	0.000682028	0.0216983	FBgn0265957	CR44744
2L	2756475	2759100	4.51989	0.00126813	0.00384791	FBgn0265997	CR44772
2L	6080025	6091650	5.98801	4.75421e-05	0.00321578	FBgn0265999	CR44773
2L	21321600	21322650	4.25404	0.00317516	0.036188	FBgn0266020	CR44785
2L	14020950	14024850	5.158	0.000318247	0.018522	FBgn0266143	CR44849
2L	14355450	14357850	4.40971	0.00250782	9.65686e-05	FBgn0266145	CR44851
2L	15435750	15436950	4.83138	0.00124491	0.0102793	FBgn0266155	CR44861
2L	15435750	15436950	4.83138	0.00124491	0.0102793	FBgn0266156	CR44862
2L	15466425	15467400	4.21385	0.00344847	0.0290663	FBgn0266157	CR44863
2L	15744825	15748275	5.39295	0.000202101	0.0127737	FBgn0266160	CR44866
2L	15911025	15914100	4.37646	0.000450126	0.00190792	FBgn0266161	CR44867
2L	15911025	15914100	4.37646	0.000450126	0.00190792	FBgn0266162	CR44868
2L	10004100	10005075	4.53007	0.00218432	0.0308657	FBgn0266167	CR44873
2L	6868275	6869325	4.95866	0.00101821	0.053285	FBgn0266220	CR44915
2L	125550	129750	5.24493	0.000326759	0.0128507	FBgn0266304	CR44969
2L	15744825	15748275	5.39295	0.000202101	0.0127737	FBgn0266309	CR44974
2L	19154625	19164675	5.22671	0.000265167	0.052267	FBgn0266312	CR44977
2L	2370900	2375775	5.52059	2.95116e-05	0.0995178	FBgn0266317	CR44982
2L	5944500	5945400	4.66615	0.00148124	0.000334903	FBgn0266321	CR44986
2L	71550	71850	3.80776	0.00659548	0.0133837	FBgn0266322	CR44987
2L	71925	73725	4.5317	0.00170823	0.00161629	FBgn0266322	CR44987
2L	8695275	8706225	6.41522	3.0532e-08	0.00403839	FBgn0266327	CR44992
2L	19935375	19936800	4.84356	0.000547705	0.006426	FBgn0266693	CR45183
2L	15488475	15490350	4.74171	0.00312678	0.0501285	FBgn0266831	CR45293
2L	4810425	4814625	7.21119	8.43028e-08	0.0267629	FBgn0266835	CR45297
2L	3506025	3508800	5.15737	0.000789637	0.00107821	FBgn0266837	CR45299
2L	66375	67575	4.54683	0.00120579	0.00306361	FBgn0266879	CR45340
2L	14020950	14024850	5.158	0.000318247	0.018522	FBgn0266892	CR45352
2L	15466425	15467400	4.21385	0.00344847	0.0290663	FBgn0266893	CR45353
2L	4364850	4367625	7.26833	2.80837e-06	0.0306537	FBgn0266903	CR45363
2L	3475650	3480675	8.17654	1.55707e-09	0.0433247	FBgn0266912	CR45372
2L	14515575	14517150	3.98746	0.00537923	0.0507076	FBgn0267257	CR45693
2L	1644600	1645950	4.50601	0.00484944	0.000189718	FBgn0267259	CR45695
2L	10388250	10388775	4.65766	0.00135188	0.014724	FBgn0267439	CR45789
2L	9943425	9944550	4.43078	0.00234722	0.0780445	FBgn0267611	CR45949
2L	8936025	8936700	4.71222	0.00546911	0.00170334	FBgn0267740	CR46071
2L	6077775	6079725	6.00437	4.84756e-05	0.0143441	FBgn0031778	CR9162
2R	12586050	12589950	5.08423	0.000439759	0.0010366	FBgn0050055	CR30055
2R	22666575	22670625	5.56198	0.000152223	0.00635615	FBgn0262142	CR42868
2R	21606600	21608850	4.97232	0.00110308	0.00535693	FBgn0262888	CR43243
2R	19145400	19149000	4.93778	0.000903769	0.021937	FBgn0263290	CR43399
2R	18811875	18813825	4.32205	0.00261405	0.00342298	FBgn0263337	CR43418
2R	6705450	6708525	4.70532	0.000977096	0.0173213	FBgn0263586	CR43611
2R	6711600	6712200	3.87493	0.00421838	0.00967708	FBgn0263586	CR43611
2R	9546300	9555075	5.93797	4.86919e-06	0.0466848	FBgn0263660	CR43651
2R	16288800	16290450	4.56463	0.00174129	0.058201	FBgn0263981	CR43730
2R	12259425	12262350	5.09194	0.000574651	0.00569929	FBgn0264501	CR43900
2R	12263100	12264825	4.68364	0.00091448	0.0112008	FBgn0264501	CR43900
2R	6529275	6531300	4.73776	0.000497538	0.0614878	FBgn0264506	CR43905
2R	6532050	6533475	4.01394	0.0030672	0.0469639	FBgn0264506	CR43905
2R	6536775	6538425	5.22897	0.000611288	0.00640159	FBgn0264506	CR43905
2R	12596400	12596925	4.21719	0.00532673	0.0263542	FBgn0264510	CR43909
2R	12599325	12600525	4.32819	0.00224949	0.0724086	FBgn0264510	CR43909
2R	13222950	13225950	5.3394	0.000625751	0.0219335	FBgn0264539	CR43918
2R	18774675	18776250	4.57191	0.00204652	0.0193558	FBgn0264679	CR43964
2R	18776550	18777600	4.3191	0.00394032	0.000558469	FBgn0264679	CR43964
2R	9610350	9611550	4.04418	0.00525734	0.0127624	FBgn0264878	CR44069
2R	6219075	6222900	4.80206	0.0012187	8.47503e-05	FBgn0265044	CR44161
2R	6870675	6873150	4.2322	0.00212221	0.00726713	FBgn0265058	CR44169
2R	7528575	7533150	5.06025	0.00033488	0.0054568	FBgn0265107	CR44209
2R	15291450	15292125	6.75941	6.45874e-06	0.0373895	FBgn0265176	CR44241
2R	8239125	8242950	4.83375	0.000262052	0.00862792	FBgn0265303	CR44276
2R	8653875	8654775	4.7704	0.000753518	0.0376457	FBgn0265308	CR44281
2R	24334875	24335625	3.77801	0.00764665	0.0971833	FBgn0265309	CR44282
2R	9183825	9186075	5.44242	0.000163294	0.00803007	FBgn0265311	CR44284
2R	9602700	9604650	4.93521	0.000959197	0.0854377	FBgn0265312	CR44285
2R	9856500	9858375	5.77935	0.000100187	0.0224833	FBgn0265339	CR44293
2R	9859875	9861975	4.57434	0.00229651	0.0921773	FBgn0265339	CR44293
2R	9862275	9863925	5.65845	8.20357e-05	0.000817957	FBgn0265339	CR44293
2R	10044225	10044975	3.85401	0.00517285	0.0232935	FBgn0265341	CR44295
2R	10045500	10050000	4.96778	0.000567207	0.00128336	FBgn0265341	CR44295
2R	10781175	10783200	4.57049	0.00142152	0.0190505	FBgn0265345	CR44299
2R	10858200	10859475	4.43968	0.00232833	0.0323402	FBgn0265348	CR44302
2R	12008700	12010875	5.71818	0.000308047	0.0669311	FBgn0265365	CR44306
2R	13854150	13854975	4.83077	0.000617943	0.0231738	FBgn0265498	CR44367
2R	15914775	15915750	4.34219	0.00291981	0.00548695	FBgn0265511	CR44373
2R	15916500	15916950	3.78083	0.00625053	0.0346923	FBgn0265511	CR44373
2R	15918150	15919350	3.86605	0.00436053	0.0309788	FBgn0265511	CR44373
2R	16582125	16584525	4.91518	0.000836686	0.00403745	FBgn0265525	CR44375
2R	16812825	16819050	5.15587	0.000791885	0.0151139	FBgn0265529	CR44379
2R	16812825	16819050	5.15587	0.000791885	0.0151139	FBgn0265530	CR44380
2R	17026800	17028900	4.92901	0.00104397	0.0367835	FBgn0265540	CR44390
2R	8239125	8242950	4.83375	0.000262052	0.00862792	FBgn0265638	CR44445
2R	18799275	18804225	5.23103	0.00044431	0.0102207	FBgn0265661	CR44468
2R	18805350	18808050	6.75281	2.29704e-06	0.0830247	FBgn0265661	CR44468
2R	19681200	19684050	5.01244	0.000915889	0.00150938	FBgn0265698	CR44505
2R	20139825	20140500	4.11998	0.00375234	0.0184204	FBgn0265847	CR44636
2R	20311725	20314950	4.66069	0.00131603	0.000892792	FBgn0265853	CR44642
2R	20532375	20535075	4.84256	0.000981429	0.00214832	FBgn0265862	CR44651
2R	20833875	20837850	4.89741	0.000862618	0.0115018	FBgn0265878	CR44667
2R	21072375	21074325	4.45481	0.00297934	0.0110605	FBgn0265915	CR44704
2R	21296175	21297075	4.6767	0.00190794	0.0125587	FBgn0265937	CR44724
2R	21661725	21665625	5.66284	0.000198041	0.0536175	FBgn0265961	CR44748
2R	22317675	22320075	5.13105	0.00132563	0.0874868	FBgn0265977	CR44756
2R	22321500	22325550	4.71861	0.00123453	0.00304559	FBgn0265977	CR44756
2R	22384125	22388850	4.67396	0.00099489	0.0298291	FBgn0265978	CR44757
2R	22389975	22391175	4.61541	0.00115325	0.000113352	FBgn0265978	CR44757
2R	22308450	22311450	5.26806	0.000629672	0.0314675	FBgn0265979	CR44758
2R	22314075	22314675	4.35664	0.00249942	4.98015e-05	FBgn0265979	CR44758
2R	22315050	22315500	3.93128	0.00547279	0.0711458	FBgn0265979	CR44758
2R	22688250	22690125	5.0457	0.000596663	0.0201736	FBgn0265983	CR44762
2R	22688250	22690125	5.0457	0.000596663	0.0201736	FBgn0265984	CR44763
2R	23382225	23384025	5.77751	1.56621e-07	0.0346923	FBgn0266011	CR44784
2R	23907825	23908575	3.78278	0.00621	0.0401556	FBgn0266041	CR44806
2R	23812125	23812350	3.92047	0.00594987	0.0527665	FBgn0266042	CR44807
2R	24058575	24059025	3.90374	0.00736903	0.0101195	FBgn0266049	CR44814
2R	24138675	24140775	4.25892	0.00298653	0.00659897	FBgn0266073	CR44826
2R	24959025	24959850	4.77571	0.00100844	0.049505	FBgn0266088	CR44830
2R	7779600	7783650	5.00629	0.00123513	0.0011514	FBgn0266577	CR45108
2R	6663750	6664425	3.79335	0.00606048	0.00640159	FBgn0266621	CR45128
2R	9284775	9285750	4.38799	0.00299897	0.0356997	FBgn0266625	CR45132
2R	10155525	10156875	4.61367	0.00207185	0.00263314	FBgn0266626	CR45133
2R	10474950	10478925	5.36301	0.00044089	0.001001	FBgn0266627	CR45134
2R	10853700	10857375	5.35572	0.000309405	0.00237967	FBgn0266629	CR45136
2R	12867675	12870825	4.99842	0.000692369	0.0089337	FBgn0266633	CR45140
2R	12879150	12881025	4.39043	0.00222408	0.0300515	FBgn0266634	CR45141
2R	15675900	15676725	4.27381	0.00167423	0.0212982	FBgn0266636	CR45143
2R	17698200	17698650	3.75393	0.00837898	0.0496332	FBgn0266639	CR45146
2R	21604500	21606525	4.39303	0.00231156	0.00347561	FBgn0266643	CR45150
2R	12178875	12179925	4.64568	0.00104169	0.0549847	FBgn0266802	CR45264
2R	22666575	22670625	5.56198	0.000152223	0.00635615	FBgn0266807	CR45269
2R	7253700	7258050	5.60148	8.54826e-05	0.032711	FBgn0266818	CR45280
2R	9441075	9445500	5.13573	0.000192592	0.0742734	FBgn0266860	CR45321
2R	23722650	23724150	5.24555	0.00047963	0.0427009	FBgn0266864	CR45325
2R	23712225	23714925	4.68393	0.00079296	0.0451623	FBgn0266865	CR45326
2R	22197300	22198425	4.73711	0.00111957	0.00127892	FBgn0266925	CR45376
2R	22199175	22199775	3.82962	0.00642697	0.0620734	FBgn0266925	CR45376
2R	19394475	19397100	5.47822	0.00035622	0.00617149	FBgn0267587	CR45925
2R	17261625	17261925	3.78101	0.00695382	0.0840988	FBgn0267659	CR45997
2R	6500850	6503775	4.81478	0.00121124	0.0112241	FBgn0267744	CR46075
3L	18841200	18841950	4.28818	0.00233784	0.0374196	FBgn0052027	CR32027
3L	19895175	19903350	5.12381	0.000323817	0.000337644	FBgn0052218	CR32218
3L	4219800	4222425	5.54693	0.000382453	0.00059592	FBgn0052252	CR32252
3L	6974625	6980325	4.82944	0.000992974	0.0632225	FBgn0047205	CR32385
3L	11380725	11381325	4.2738	0.00307526	0.0308502	FBgn0261813	CR42755
3L	223950	226200	4.73856	0.000850374	0.00152626	FBgn0262109	CR42862
3L	71100	72900	4.61215	0.00242555	0.00925954	FBgn0262680	CR43150
3L	159000	160800	4.46195	0.00246959	0.000149428	FBgn0262681	CR43151
3L	156000	158625	4.19614	0.00254049	0.000993947	FBgn0262681	CR43151
3L	22669125	22672575	5.71914	4.53402e-05	0.00234662	FBgn0262951	CR43270
3L	625950	628050	5.50251	2.23907e-05	0.00936583	FBgn0263039	CR43334
3L	632625	635700	5.00591	0.000441472	0.00393742	FBgn0263342	CR43423
3L	637800	644250	5.05475	0.000242572	0.0661069	FBgn0263342	CR43423
3L	22850850	22851750	4.02423	0.00438262	0.0138297	FBgn0263345	CR43426
3L	14976225	14978925	5.03034	0.000359828	0.0034588	FBgn0263380	CR43432
3L	1488600	1489425	3.89013	0.00587873	0.0901791	FBgn0263839	CR43701
3L	820125	822525	4.80165	0.000550338	0.0501548	FBgn0264475	CR43883
3L	20730375	20735175	5.95438	0.000327778	0.000703435	FBgn0264573	CR43945
3L	16044375	16048725	4.96243	0.000442463	0.00376215	FBgn0264602	CR43951
3L	6036000	6039150	5.79407	1.80455e-05	0.035108	FBgn0264603	CR43952
3L	71100	72900	4.61215	0.00242555	0.00925954	FBgn0264720	CR43988
3L	9743025	9744375	4.16724	0.00437291	0.0074993	FBgn0265448	CR44348
3L	6261450	6262125	4.15639	0.00399186	0.0114928	FBgn0265715	CR44522
3L	8688450	8691900	4.48514	0.00177406	0.0193409	FBgn0265719	CR44526
3L	8691975	8692950	4.09123	0.00339654	0.000677074	FBgn0265719	CR44526
3L	8695275	8698125	5.21364	0.000432049	0.00823999	FBgn0265719	CR44526
3L	10201425	10204500	4.80995	0.0012432	0.0148996	FBgn0265731	CR44538
3L	11034525	11037075	4.87025	0.000394416	0.0179287	FBgn0265740	CR44547
3L	17630550	17633400	4.04925	0.00411665	0.00140313	FBgn0265759	CR44566
3L	17630550	17633400	4.04925	0.00411665	0.00140313	FBgn0265760	CR44567
3L	11272200	11277825	5.75941	0.000158096	0.00935217	FBgn0265931	CR44720
3L	11323725	11327625	4.41355	0.00201223	0.0060931	FBgn0265932	CR44721
3L	11323725	11327625	4.41355	0.00201223	0.0060931	FBgn0265933	CR44722
3L	11323725	11327625	4.41355	0.00201223	0.0060931	FBgn0265934	CR44723
3L	3517575	3521325	4.18677	0.00139631	0.0205066	FBgn0266403	CR45043
3L	9693525	9698775	5.43566	0.000306824	0.0131063	FBgn0266596	CR45121
3L	11631825	11637975	4.70329	0.000873122	0.00794749	FBgn0266651	CR45158
3L	22737075	22738725	4.9621	0.000994072	0.00175981	FBgn0266656	CR45163
3L	1323075	1324200	4.42942	0.00321939	0.0384249	FBgn0266676	CR45166
3L	1325250	1326225	4.5188	0.00195319	0.0263265	FBgn0266676	CR45166
3L	12514500	12517050	7.64833	2.14153e-08	0.0180511	FBgn0266678	CR45168
3L	14409675	14411100	4.26976	0.00279413	0.00933046	FBgn0266768	CR45233
3L	18196800	18199125	4.5984	0.00169126	0.00491338	FBgn0266769	CR45234
3L	16667625	16668675	4.22398	0.00396212	0.0491807	FBgn0266776	CR45241
3L	16670250	16671525	4.36556	0.0020281	0.0357792	FBgn0266776	CR45241
3L	11338200	11342325	4.79354	9.31022e-05	0.0780869	FBgn0266785	CR45250
3L	11347650	11351100	5.81906	2.80361e-05	0.0150441	FBgn0266786	CR45251
3L	18077850	18079950	4.53369	0.00146058	0.00931951	FBgn0266941	CR45392
3L	17942400	17951850	5.75707	7.97658e-05	0.0419674	FBgn0266942	CR45393
3L	15142350	15144675	4.60377	0.001694	0.012434	FBgn0266945	CR45396
3L	15142350	15144675	4.60377	0.001694	0.012434	FBgn0266946	CR45397
3L	128775	133950	5.79363	8.94387e-05	0.0241795	FBgn0266949	CR45400
3L	119550	121350	4.40519	0.00151429	0.0143475	FBgn0266950	CR45401
3L	11285775	11288850	6.85806	7.70211e-05	0.00376176	FBgn0266953	CR45404
3L	9762900	9765150	5.31031	0.000537639	0.0204115	FBgn0266956	CR45407
3L	5980125	5981400	4.3667	0.00214508	0.0460235	FBgn0266988	CR45439
3L	13017975	13018875	3.94928	0.00444182	0.0141876	FBgn0266994	CR45445
3L	22840050	22840650	4.63939	0.00199269	0.00774234	FBgn0267219	CR45659
3L	4106250	4110750	5.24106	0.000506582	0.00164236	FBgn0267230	CR45670
3L	19929450	19931250	4.24149	0.00303563	0.0521659	FBgn0267238	CR45678
3L	3389250	3391050	4.60041	0.00204215	0.0272065	FBgn0267301	CR45737
3L	4239600	4240650	4.17193	0.00326403	0.00205728	FBgn0267302	CR45738
3L	9693525	9698775	5.43566	0.000306824	0.0131063	FBgn0267454	CR45804
3L	128775	133950	5.79363	8.94387e-05	0.0241795	FBgn0267455	CR45805
3L	603000	604275	4.08279	0.00433332	0.0326998	FBgn0267457	CR45807
3L	1003500	1009875	4.86693	0.000822461	0.02479	FBgn0267461	CR45811
3L	8842350	8842950	3.93761	0.0077027	0.0707013	FBgn0267473	CR45823
3L	1964325	1964550	3.79316	0.00611229	0.0227871	FBgn0267478	CR45828
3L	1783725	1784625	4.58661	0.00231453	0.0705141	FBgn0267484	CR45834
3L	7360350	7361700	4.86219	0.00239271	0.0107965	FBgn0267485	CR45835
3L	8056425	8060250	5.01628	0.000773019	0.02303	FBgn0267527	CR45867
3L	8056425	8060250	5.01628	0.000773019	0.02303	FBgn0267528	CR45868
3L	8185500	8187600	5.2099	0.0006042	0.0113884	FBgn0267530	CR45870
3L	9455475	9457200	4.57927	0.00165149	0.0111727	FBgn0267533	CR45873
3L	9892425	9893625	4.94535	0.00057716	0.00127151	FBgn0267535	CR45875
3L	11684475	11685375	4.93354	0.000599306	0.0620136	FBgn0267545	CR45885
3L	16697100	16701525	6.16663	0.000139198	0.0124289	FBgn0267557	CR45897
3L	16885650	16888125	4.25939	0.00222255	0.0397401	FBgn0267558	CR45898
3L	16878450	16880625	4.63092	0.00171165	0.0183821	FBgn0267558	CR45898
3L	18243825	18245175	4.06268	0.00509265	0.00190549	FBgn0267598	CR45936
3L	18755775	18758025	4.18995	0.00319496	0.000158651	FBgn0267600	CR45938
3L	18800100	18801675	4.81094	0.000867366	0.000354919	FBgn0267601	CR45939
3L	19179750	19182900	5.0198	0.000813478	0.00282785	FBgn0267603	CR45941
3L	21304500	21305100	4.01957	0.00432617	0.0490741	FBgn0267614	CR45952
3L	21411225	21416775	5.63772	7.45404e-05	0.0261345	FBgn0267616	CR45954
3L	15624675	15625725	3.8242	0.00506258	0.0283712	FBgn0267639	CR45977
3L	14427975	14429025	3.65811	0.00860126	0.0363604	FBgn0267695	CR46031
3L	16667625	16668675	4.22398	0.00396212	0.0491807	FBgn0267697	CR46033
3L	19294650	19296525	5.28386	0.000139198	0.0356594	FBgn0267715	CR46048
3R	29214525	29215950	4.55357	0.00177806	5.35224e-05	FBgn0051044	CR31044
3R	31712925	31716000	5.41446	0.000197453	0.0199781	FBgn0054046	CR34046
3R	16004700	16013025	5.46139	0.000729965	0.0101753	FBgn0262028	CR42839
3R	22623825	22627800	5.52188	0.000139198	0.0059515	FBgn0263452	CR43475
3R	5610225	5611425	3.87245	0.0039495	0.0261427	FBgn0263619	CR43628
3R	5045475	5046150	4.55506	0.00144776	0.0044181	FBgn0263626	CR43635
3R	13814925	13815675	4.48869	0.00229275	0.0782781	FBgn0263650	CR43641
3R	26020350	26022600	4.70544	0.00141816	0.00405822	FBgn0263652	CR43643
3R	26020350	26022600	4.70544	0.00141816	0.00405822	FBgn0263653	CR43644
3R	22779975	22781550	4.5277	0.00193696	0.0913747	FBgn0263663	CR43654
3R	22781625	22782150	3.76433	0.00830058	0.0348887	FBgn0263663	CR43654
3R	7088400	7088775	3.84654	0.00526935	0.0608822	FBgn0263768	CR43685
3R	7088850	7091025	4.58055	0.00157232	0.000121824	FBgn0263768	CR43685
3R	6409125	6413250	4.85178	0.000978974	0.0465511	FBgn0264787	CR44017
3R	5250750	5251125	3.89389	0.00806289	0.0210024	FBgn0264789	CR44019
3R	21617700	21619575	4.28003	0.00250393	0.0270237	FBgn0264826	CR44034
3R	20826975	20830725	5.0718	0.000409293	0.0137383	FBgn0264839	CR44047
3R	24230550	24231225	4.31755	0.00237363	0.0547882	FBgn0264901	CR44092
3R	14568675	14569500	3.98348	0.00610659	0.00152228	FBgn0264904	CR44095
3R	19151475	19153875	5.01964	0.000581523	0.00915222	FBgn0264916	CR44107
3R	4677525	4679775	4.61739	0.00113008	0.00254774	FBgn0265040	CR44157
3R	26258175	26258475	3.71789	0.00812488	0.0415857	FBgn0265380	CR44321
3R	26259000	26261925	4.40432	0.00183536	0.0176118	FBgn0265380	CR44321
3R	8105550	8110125	7.1341	1.15468e-08	0.00111393	FBgn0265419	CR44331
3R	8111775	8116875	5.96722	1.27415e-05	0.0228521	FBgn0265419	CR44331
3R	10380150	10395525	5.60673	0.000249979	0.0202145	FBgn0266243	CR44938
3R	10760700	10762350	4.71131	0.000994627	0.00607207	FBgn0266372	CR45016
3R	26000700	26001900	5.59867	0.000296379	0.0781621	FBgn0266397	CR45037
3R	26004075	26013150	5.82134	4.76934e-05	0.0205707	FBgn0266398	CR45038
3R	26004075	26013150	5.82134	4.76934e-05	0.0205707	FBgn0266399	CR45039
3R	19907475	19910850	4.57949	0.00114401	0.00519453	FBgn0266407	CR45047
3R	19907475	19910850	4.57949	0.00114401	0.00519453	FBgn0266408	CR45048
3R	9629925	9632475	4.65108	0.00126651	0.000208906	FBgn0266413	CR45053
3R	10082925	10086525	5.88538	0.000286233	0.00043723	FBgn0266414	CR45054
3R	5839125	5840775	3.93332	0.00416847	0.042688	FBgn0266702	CR45192
3R	9224175	9228225	5.6229	0.000139198	0.000631182	FBgn0266706	CR45196
3R	16049550	16049775	3.76736	0.00808426	0.0198335	FBgn0266739	CR45212
3R	24230550	24231225	4.31755	0.00237363	0.0547882	FBgn0266744	CR45217
3R	16991700	16992150	3.89744	0.00596442	0.0764067	FBgn0266748	CR45221
3R	31689300	31690500	3.83228	0.00388978	0.0166167	FBgn0267125	CR45565
3R	5052900	5055900	4.96966	0.000715574	0.0274324	FBgn0267148	CR45588
3R	13782825	13784175	4.53158	0.0026002	0.000874128	FBgn0267150	CR45590
3R	16986300	16988325	5.13343	0.000466115	0.0029648	FBgn0267152	CR45592
3R	11778750	11781525	5.67925	0.000205188	0.0273669	FBgn0267155	CR45595
3R	14283900	14286450	4.90273	0.000382705	0.0653905	FBgn0267156	CR45596
3R	16205100	16208100	4.98605	0.000671438	0.0356888	FBgn0267199	CR45639
3R	16219500	16222050	4.51827	0.00158193	0.0386621	FBgn0267203	CR45643
3R	16222125	16225350	4.93372	0.000490628	0.0188959	FBgn0267203	CR45643
3R	21855975	21861450	4.89128	0.000816531	0.0120289	FBgn0267204	CR45644
3R	21855975	21861450	4.89128	0.000816531	0.0120289	FBgn0267205	CR45645
3R	5261700	5266950	4.87462	0.00102419	0.00184171	FBgn0267443	CR45793
3R	21268350	21269700	4.46577	0.00187877	0.00289963	FBgn0267448	CR45798
3R	7085925	7087725	4.38131	0.00200251	3.21951e-05	FBgn0267567	CR45907
3R	6807525	6814575	5.56286	0.000423753	0.0164958	FBgn0267575	CR45915
3R	12368925	12371100	5.25047	0.000276421	0.00393837	FBgn0267679	CR46015
3R	20587350	20589000	4.14576	0.00471642	0.00402274	FBgn0267711	CR46044
3R	21629325	21634800	5.4849	3.54573e-05	0.0436071	FBgn0267722	CR46055
3R	21643050	21643650	4.10247	0.00512485	0.036577	FBgn0267723	CR46056
3R	21643050	21643650	4.10247	0.00512485	0.036577	FBgn0267724	CR46057
3R	26234850	26237775	4.69348	0.00179701	0.00157578	FBgn0267730	CR46061
3R	24319125	24320325	4.79284	0.00175371	0.00812811	FBgn0267762	CR46093
3R	24563775	24577200	5.38946	0.000252026	0.00456717	FBgn0267763	CR46094
3R	24608850	24609825	4.51821	0.00186492	0.018004	FBgn0267764	CR46095
3R	25737825	25738875	4.19458	0.00274407	0.00262626	FBgn0267771	CR46102
3R	25739475	25740300	3.70181	0.00757066	0.0041234	FBgn0267771	CR46102
3R	29773725	29775900	5.1219	0.000735888	0.0832767	FBgn0267779	CR46110
3R	29776125	29779125	5.20174	0.000371268	0.0499801	FBgn0267779	CR46110
3R	30104100	30107025	4.77602	0.000954628	0.0183709	FBgn0267781	CR46112
3R	30269775	30273900	5.80053	3.26441e-05	0.0263962	FBgn0267782	CR46113
4	136500	136875	3.6157	0.00897405	0.027484	FBgn0264616	CR43956
4	56700	57150	3.7952	0.00684186	0.093327	FBgn0264617	CR43957
4	555600	559575	5.56444	0.000373297	0.047428	FBgn0264618	CR43958
